# Supplementary material
Source: PubMed Central journal article supplement (PMC5364309)
Supplement: IAI.00841-16_zii999092005s1.pdf [file IAI.00841-16_zii999092005s1.pdf]

## Supplementary material

Supplementary figure 1 A)

In silico characterization of *var* gene primers used in the present study

Supplementary figure 1 B)

In silico comparison of new DBL $\alpha$  targeting primers to old versions published by Lavstsen et al. PNAS, 2012

Supplementary Figure 2.

Overview of PfEMP1 domain classes, the estimated proportion of *var* genes encoding these, and predicted coverage of applied primer sets.

Supplementary Figure 3:

Transcript levels by primer sets reporting statistically significant different transcript levels between hospitalized patients with uncomplicated and severe malaria.

Supplementary Figure 4:

Median (25 and 75 percentiles, upper and lower adjacent values and outliers) *var* transcript levels (Tu) reported in children with severe malarial anaemia (N=44) or cerebral malaria (N=29) with the primer set targeting DBL1/3-1.

Supplementary Table 1.

Percentage of individuals of each patient group with *var* transcript levels higher than 16 Tu

Supplementary Figure 1A - In silico characterization of *var* gene primers used in the present study

| Primer name<br>(Target domain type) | Forward primers                                                                                                                               | Reverse primers                                                                                          | Amplicon size            | Coverage                                                                                                      | Specificity                                                                                                                                                                                                 |
|-------------------------------------|-----------------------------------------------------------------------------------------------------------------------------------------------|----------------------------------------------------------------------------------------------------------|--------------------------|---------------------------------------------------------------------------------------------------------------|-------------------------------------------------------------------------------------------------------------------------------------------------------------------------------------------------------------|
|                                     | Mixed to a final total primer concentration of 20 μM                                                                                          | Mixed to a final total primer concentration of 20 μM                                                     | Median (Min - Max)<br>bp | Number of sequences amplified with intended domain class / number of sequences with intended domain class (%) | Number of sequences amplified with intended domain class / number of domain sequences amplified (%)<br><br>Specificity graphic                                                                              |
| CIDRa1.1<br>(CIDRα1.1)              | TGGGAACATCAACTTAAGGATTGCATA<br>TGGGAACATCAACTTAAGAATTGCATA<br>TGGGAACATGAACTTAAGGATTGCATA                                                     | TAAATCTTYCNTAAATTGATHCCAT                                                                                | 270 (270-273)            | 274/290 (95%)                                                                                                 | 274/277 (99%)<br>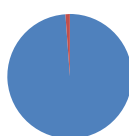                                                                                                        |
| CIDRa1.8a<br>(CIDRα1.8a)            | ATAATTGTGAAATGAAAGTTCA                                                                                                                        | TATGCAMTCTTAAGTTGGTTCC                                                                                   | 140 (140-140)            | 104/104 (100%)                                                                                                | 104/104 (100%)<br>                                                                                                       |
| CIDRa1.8b<br>(CIDRα1.8b)            | AATAGACAGTATAATGTGGGAA<br>AAAGGATACTATAAAGTGGGAA                                                                                              | CAAAACATWTACAATTTGTTACA                                                                                  | 101 (98-101)             | 61/61 (100%)                                                                                                  | 61/122 (50%)<br>[Off target sequences also targeted by CIDRa1.4 and CIDRa1.6b primers, albeit all with 2 mismatches]<br> |
| CIDRa1.8<br>(CIDRα1.8)              | Comment:<br>A summarized transcript level for CIDRα1.8 domains (CIDRa1.8a+8b). There is no overlap between targeted sequences.                |                                                                                                          |                          |                                                                                                               |                                                                                                                                                                                                             |
| CIDRa1.DC8                          | Comment:<br>A summarized transcript level for DC8 domains (CIDRa1.1+CIDRa1.8a+8b). There is no overlap between targeted sequences.            |                                                                                                          |                          |                                                                                                               |                                                                                                                                                                                                             |
| CIDRa1.4/6a<br>(CIDRα1.4/6a)        | AACTATCAAAAATGGGAATGCTATTA<br>AACTATGAACAATGGAATGCTATTA<br>AACTATCAAAAATGGGAATGCTATTA<br>AACTATGAAAATGGCAATGCTATTA<br>AACAATCAAATGGAATGCTATTA | AATGGGACAAACAAAAACAAATATG                                                                                | 163 (163-172)            | CIDRα1.4: 281/345 (81%)<br>CIDRα1.6a: 31/54 (58%)                                                             | 312/319 (98%)<br>                                                                                                      |
| CIDRa1.5a<br>(CIDRα1.5a)            | GATTTATGGATTAAGAATTTATTAAG<br>GATTTGTGGGTTACGAATTTATTAAG<br>GATTTGTGGGTTACATATTTATTAAG                                                        | TAATTCATCCGTAATTTCTCCA<br>CAAATCTTCCTTAAGTTTTTCCA<br>TAATTCATCCGTAATTTGATTCCA<br>CAAATCTTCCTTAAGTTTTTCCA | 306 (306-306)            | 98/104 (94%)                                                                                                  | 98/98 (100%)<br>                                                                                                       |
| CIDRa1.5b<br>(CIDRα1.5b)            | ACGATACTAGACTGGAAATACG<br>ATTGGGAANATAAACTTAAGACCTG<br>TGGATACTACAGATTGGGATCGTA                                                               | AACCCATTGTTCAAAAACATTTACA<br>AACCCATTTATCAAAAACAGTACA<br>AACCCATTTATCAAAAACACATACA                       | 110 (98-113)             | 119/124 (96%)                                                                                                 | 114/114 (100%)<br>                                                                                                     |
| CIDRa1.5                            | Comment:<br>A summarized transcript level for CIDRα1.5 (CIDRa1.5a+CIDRa1.5b). There is no overlap between targeted sequences.                 |                                                                                                          |                          |                                                                                                               |                                                                                                                                                                                                             |
| CIDRa1.6b<br>(CIDRα1.6b)            | ATAATACTAATGTSACGGATTGT                                                                                                                       | CAGTTTCTTTATACTATCCCATTC<br>ACATCCTTTTACTACCCCATTC<br>AATTCCTTTTACTCTTCCATTCG                            | 107 (104-107)            | 81/81 (100%)                                                                                                  | 81/112 (72%)<br>[50% of the targeted genes are also targeted by 3 other primer sets: CIDRa1.4/7/8b]<br>                |

| Primer name<br>(Target domain type)         | Forward primers<br><br>Mixed to a final total primer concentration of 20 µM                                                                                                     | Reverse primers<br><br>Mixed to a final total primer concentration of 20 µM                                                                                 | Amplicon size<br><br>Median (Min - Max) bp | Coverage<br><br>Number of sequences amplified with intended domain class / number of sequences with intended domain class (%) | Specificity<br><br>Number of sequences amplified with intended domain class / number of domain sequences amplified (%)<br><br>Specificity graphic                                                                                                                       |
|---------------------------------------------|---------------------------------------------------------------------------------------------------------------------------------------------------------------------------------|-------------------------------------------------------------------------------------------------------------------------------------------------------------|--------------------------------------------|-------------------------------------------------------------------------------------------------------------------------------|-------------------------------------------------------------------------------------------------------------------------------------------------------------------------------------------------------------------------------------------------------------------------|
| CIDRa1.7<br>(CIDRa1.7)                      | CGGAAACTATAACGTGGAACGATAA<br>CGGAAACTATAAGGTGGAACGATAA<br>CGGAAACTATAACGTGGAAGATAA<br>GGACTATAATGTGGAATGATAA                                                                    | TAGTTTCTTTATACTATTCCATTC<br>TAGTTCTTTATACTATTCCATTC<br>TAGTTTCTTTATATTATTCCATTC<br>TAGTTTCTTTATACTACTCCATTC<br>TAATTCCTTTATATTATTCCATTC                     | 148 (145-149)                              | 277/282 (99%)                                                                                                                 | 277/395 (70%)<br>[unintended hits are all var1 CIDRa1.2]<br>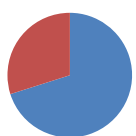                                                                                                                         |
| CIDRa1.A<br>(CIDRa1 of group A)             | Comment:<br>A summarized transcript level for all group A CIDRa1 domains (CIDRa1.4-7 primers). There is an estimated 2% of genes targeted twice by these primer sets.           |                                                                                                                                                             |                                            |                                                                                                                               |                                                                                                                                                                                                                                                                         |
| CIDRa1.all<br>(All CIDRa1)                  | Comment:<br>A summarized transcript level for all CIDRa1 domain primers. There is an estimated 5% of genes targeted twice by these primer sets.                                 |                                                                                                                                                             |                                            |                                                                                                                               |                                                                                                                                                                                                                                                                         |
| CIDRd<br>(N-terminal CIDR6)                 | TAAATGTAACCTAGATGTATGTGAAC<br>TAAATGTAACCTACATGTATGTGAAC<br>TAAATGTAACCTAGACGTATGTGAAC<br>TAAATGTACTTAGATGTATGTGAAC<br>TAAATGTAACCTAGATATATGTGAAC<br>TAAATGTAAGTTAGATGTATGTGAAC | AATACTTTAACCAACGCTTAATCAATAC<br>AATACTTTAACCAACGCTTAATCAATAC<br>AATACTGCAACCAACGCTTAATCAATAC<br>AATGCTTAACCAACGCTTAATGAATAC<br>AATACATCAACCAACGCTTAATCAATAC | 104 (104-104)                              | 308/410 (75%)                                                                                                                 | 308/350 (88%)<br>                                                                                                                                                                    |
| CIDRg3.1<br>(CIDRy3.1)                      | TATGTATATGCTGATGAACGTATTAC                                                                                                                                                      | TTCTATCCATTTTTCTAAACATTC                                                                                                                                    | 174 (174-174)                              | 81/81 (100%)                                                                                                                  | 81/81 (100%)<br>[The N-terminal group A CIDRy domains (ie. CIDRy3 domains) are diversified into several small subgroups of which the CIDRy3.1 is the largest (~20% of CIDRy3)]<br> |
| CIDRa3.1/2<br>(CIDRa3.1/2)                  | AHWWVCAAAGACRTWCHATRATTT<br>AHWWVCAAAGACRTTCAATCCT<br>ARAAAGTAAAGGATTATGTWGRITTT                                                                                                | TTTTTGTCTCCAARTRATRGAATC                                                                                                                                    | 80 (80-81)                                 | 1479/1970 (75%)<br>CIDRa2-6: 1536/9142 (17%)                                                                                  | 1479/1536 (96%)<br>CIDRa2-6: 1536/1536 (100%)<br>                                                                                                                                  |
| DBLa2/1.1/2/4/7<br>(DBLa2/1.1/2/4/7)        | GATTAYGTBCCTCAATTTTTAMGWTGGT                                                                                                                                                    | TACAATCATATCCATTAWGACTACAA<br>TCACAATCGCATCAATTATGACTACAA                                                                                                   | 145 (145-157)                              | 1422/1736 (82%)                                                                                                               | 1422/1489 (82%)<br>                                                                                                                                                                |
| DBLa1.5/6/8<br>(DBLa1.5/6/8)                | GATTAYGTBCCTCAATTTTTAMGWTGGT                                                                                                                                                    | TTTTAGTACAATCATAACCCACCA<br>GATTTGTTTTTTTACAATCGTAACCCCTC<br>ACAATCCTCACCATCACCATAAAT<br>CGTGATATATCTGTTTAKGTACAATC<br>GATCTGTTGTTTACAATCGTAACCCCTC         | 157 (144-173)                              | 596/812 (73%)                                                                                                                 | 596/666 (90%)<br>                                                                                                                                                                  |
| DBLa1all<br>(DBLa1.1-8)                     | TTGGGAAATGTRTRRTGTTACAGCAA<br>TTGGGAAATGTTAGTTATGGCAA<br>TTGGGAAATTTGTTAGTTATGGCAAG<br>TTGGGAAACCTATTAGTTATGGCAA<br>TTAGGAAATATATTGGTAGCAGCAA<br>TTAGGAAATATCTTGGTCACAGCAA      | CCTATATCNGCAAACKCKWGC                                                                                                                                       | 116 (116-128)                              | 2211/2404 (92%)                                                                                                               | 2211/2211 (100%)<br>                                                                                                                                                               |
| DBLb1/3-1<br>(Group A DBLβ1/3, subdomain 3) | TATACAAASAAGCAGAAATTTATGC<br>TACGCAAAGCAGAAATTTGTGCTA                                                                                                                           | TTATAATACCCAGGACCRCCATT                                                                                                                                     | 52 (50-52)                                 | N/A<br>(8% of DBLβ3)<br>(25% of DBLβ1 not var1)                                                                               | N/A<br>                                                                                                                                                                            |

| Primer name<br>(Target domain type)         | Forward primers<br><br>Mixed to a final total primer concentration of 20 µM                                             | Reverse primers<br><br>Mixed to a final total primer concentration of 20 µM                                | Amplicon size<br><br>Median (Min - Max) bp | Coverage<br><br>Number of sequences amplified with intended domain class / number of sequences with intended domain class (%) | Specificity<br><br>Number of sequences amplified with intended domain class / number of domain sequences amplified (%)<br><br>Specificity graphic    |
|---------------------------------------------|-------------------------------------------------------------------------------------------------------------------------|------------------------------------------------------------------------------------------------------------|--------------------------------------------|-------------------------------------------------------------------------------------------------------------------------------|------------------------------------------------------------------------------------------------------------------------------------------------------|
| DBLb1/3-2<br>(Group A DBLβ1/3, subdomain 3) | AACATGCACKAGTCGATATTGCT                                                                                                 | CAGTAGAAGTWTARGACCACCAT                                                                                    | 51 (51-51)                                 | N/A<br>(5% of DBLβ3)<br>(18% of DBLβ1 not var1)                                                                               | N/A<br>                                                           |
| DBLb5-S1<br>(DBLβ5 subdomain 1)             | AACAAAGTAGCGTATCAAATGCAT<br>AACAAARYGACAMCWAATGCATVA                                                                    | CCTTKTGWTCATYRSCCYTYAA                                                                                     | 92 (89-95)                                 | 521/1428 (37%)                                                                                                                | 521/661 (79%)<br>[No target overlap with other DBLβ primers]<br>  |
| DC5<br>(DBLβ domains in DC5)                | GTTGCTCCYMCCTTTTGTAAATGT<br>CCCCCHCCYTTTTGTAAYGTNCC<br>TTGCACCCATTTTTGTAATATGCC                                         | ACCACRTTGGTCGCATCTTTGTC<br>CACTCACTATGTTGGTGTCATTTTT<br>GCCASCACCTTCWACTCCNACCAC<br>YACAYTWACCACATTTNGTSGM | 69 (62-83)                                 | 388/500 (78%)                                                                                                                 | 388/388 (100%)<br>[No target overlap with other DBLβ primers]<br> |
| DBLe2<br>(DBLe2)                            | AAAWTTAATWGGTTTGGRAGCAC<br>AATTTTRATWGGTTTAAATGCAYACA                                                                   | GACATAATGTTGYACTCTAGGAGRMA                                                                                 | 86 (85-89)                                 | 335/416 (80%)                                                                                                                 | 335/335 (100%)<br>                                                |
| DBLe6<br>(DBLe6)                            | GTTGCATAYAATGAAGGTTATTTCT<br>AAAACRRACTTATGAATTSTGCCTACA<br>ATTTCTCAATATGYCTAYACTSAAGGA                                 | ATCHGTWCCTTTAACTATATCTCCATA<br>ATCTYTACCTTTTACTATATCAGCAAT                                                 | 127 (117-135)                              | 335/442 (76%)                                                                                                                 | 335/387 (87%)<br>                                               |
| DBLe11<br>(DBLe11)                          | AAAGHATTACAAAAAGAYGCATAT<br>CATTACAATATGTCATATAATSAAAG<br>AAATACAGGAATCAGCATAACAAGAAAG                                  | TTCCTTTAATTAATYASCATAATCWGCA<br>TCAGCATAACTYCTTTTCATATTTTCA                                                | 177 (151-178)                              | 287/315 (91%)                                                                                                                 | 287/287 (100%)<br>                                              |
| DBLe13<br>(DBLe13)                          | CTGTTGCTGCAAAATSAAGGATATAAT<br>CTGCTGYTGCAAAATGTCATATAAT                                                                | ATAATCRTAAAAACTRTATTTCAATGCAT                                                                              | 107 (107-107)                              | 185/196 (85%)                                                                                                                 | 185/185 (100%)<br>                                              |
| DBLe14<br>(DBLe14)                          | TTTAAYCAAGGAATWCTTTTAGGAA                                                                                               | ATATCTSCARTACAGAAAACATAT                                                                                   | 95 (95-101)                                | 117/137 (85%)                                                                                                                 | 117/193 (61%)<br>                                               |
| DBLe_all<br>(DBLe2/6/11/13/14)              | Comment:<br>A summarized transcript level for all DBLe primers. There is no overlap between the primer sets summarized. |                                                                                                            |                                            |                                                                                                                               |                                                                                                                                                      |
| DBLz2a<br>(DBLz2)                           | CCTCAACGTTTRAGATGGATGAAG                                                                                                | ATTTTGCAACATAYTCTCCCAT                                                                                     | 50 (50-50)                                 | 64/336 (19%)                                                                                                                  | 64/142 (45%)<br>                                                |

| Primer name<br>(Target domain type)        | Forward primers<br><br>Mixed to a final total primer concentration of 20 µM                                                                                                                                                                          | Reverse primers<br><br>Mixed to a final total primer concentration of 20 µM | Amplicon size<br><br>Median (Min - Max) bp | Coverage<br><br>Number of sequences amplified with intended domain class / number of sequences with intended domain class (%) | Specificity                                                                                         |                     |
|--------------------------------------------|------------------------------------------------------------------------------------------------------------------------------------------------------------------------------------------------------------------------------------------------------|-----------------------------------------------------------------------------|--------------------------------------------|-------------------------------------------------------------------------------------------------------------------------------|-----------------------------------------------------------------------------------------------------|---------------------|
|                                            |                                                                                                                                                                                                                                                      |                                                                             |                                            |                                                                                                                               | Number of sequences amplified with intended domain class / number of domain sequences amplified (%) | Specificity graphic |
| DBLz2b<br>(DBLz2)                          | AGTGACCCTCTGGGATGATTA                                                                                                                                                                                                                                | TGCAATAATTTTCACTCCATCTCT                                                    | 73 (73-73)                                 | 114/336 (34%)                                                                                                                 | 114/114 (100%)                                                                                      |                     |
| DBLz2c<br>(DBLz2)                          | ATGTRCCTCAAATACTTAGATGGATWA                                                                                                                                                                                                                          | TTCTTGCAATTCACAAAAATGTTC                                                    | 62 (62-62)                                 | 104/336 (31%)                                                                                                                 | 104/104 (100%)                                                                                      |                     |
| DBLz2<br>(DBLz2)                           | Comment:<br>A summarized transcript level for DBLz2 domains (DBLz2a+DBLz2b+DBLz2c). There is no overlap between the primer sets summarized.                                                                                                          |                                                                             |                                            | 282/336 (84%)                                                                                                                 | 282/371 (76%)                                                                                       |                     |
| DBLz3<br>(DBLz3)                           | AACCTCCTTATGTTGATTACATTCCACA<br>ATCCTCCTTATGATGATTATATWCCWCA                                                                                                                                                                                         | TTCTGACCATTCACTCATCTCT                                                      | 59 (59-59)                                 | 90/264 (34%)                                                                                                                  | 90/90 (100%)                                                                                        |                     |
| DBLz5<br>(DBLz5)                           | GATTATGATTATATYCCTCAACCTT                                                                                                                                                                                                                            | TTCRCYCCATTCACCTAKKCAKCG                                                    | 51 (51-51)                                 | 233/248 (94%)                                                                                                                 | 233/233 (100%)                                                                                      |                     |
| DBLz4<br>(DBLz4)                           | AACCTCCTGATTATGATTATACCT                                                                                                                                                                                                                             | CAATAATATTCACCTCATCTTTC                                                     | 67 (67-67)                                 | 281/302 (93%)                                                                                                                 | 281/390 (72%)<br>[55% of targets also targeted by DBLz6]                                            |                     |
| DBLz6<br>(DBLz6)                           | CCTGATTATGATTATATWCCYCAACCTT                                                                                                                                                                                                                         | TTCACTCCATCTTGCATSMACG                                                      | 54 (54-54)                                 | 324/400 (81%)                                                                                                                 | 324/444 (73%)                                                                                       |                     |
| DBLz4/6<br>(DBLz4/6)                       | Comment:<br>Due to the considerable overlap between DBLz4 and DBLz6 primer sets, the transcript level for these domains were analysed using only the data from the primer reporting highest transcript level, i.e. either DBLz4 or the DBLz6 primer. |                                                                             |                                            |                                                                                                                               |                                                                                                     |                     |
| DBLz_all<br>(DBLz)                         | Comment:<br>The summarized transcript level for all DBLz domains calculated as sum of DBLz2+z3+z4/6. There is no overlap between the primer sets summarized.                                                                                         |                                                                             |                                            |                                                                                                                               |                                                                                                     |                     |
| var3<br>(DBLz8 of DC3 aka.<br>DBLz3-DBLz8) | AAGAGGATCTACTTAATGCTGCTTTAG                                                                                                                                                                                                                          | AACTGAACCTCATAGCCTCATATGC                                                   | 99 (99-99)                                 | 164/164 (100%)                                                                                                                | 164/164 (100%)                                                                                      |                     |

↑ "DBLe8" from Lavstsen et al. PNAS, 2012

| Primer name<br>(Target domain type) | Forward primers<br><br>Mixed to a final total primer concentration of 20 µM | Reverse primers<br><br>Mixed to a final total primer concentration of 20 µM | Amplicon size<br><br>Median (Min - Max) bp | Coverage<br><br>Number of sequences amplified with intended domain class / number of sequences with intended domain class (%) | Specificity<br><br>Number of sequences amplified with intended domain class / number of domain sequences amplified (%) | Specificity graphic                                                                 |
|-------------------------------------|-----------------------------------------------------------------------------|-----------------------------------------------------------------------------|--------------------------------------------|-------------------------------------------------------------------------------------------------------------------------------|------------------------------------------------------------------------------------------------------------------------|-------------------------------------------------------------------------------------|
| var2csa<br>(DBLpam3<br>aka. DBL3x)  | AATGGGACAAACAAAAACAAATATG                                                   | GCTGATATACATTGAGATAATTTTC                                                   | 94 (94-94)                                 | 265/265 (100%)                                                                                                                | 265/265 (100%)                                                                                                         | 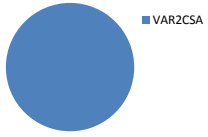 |

↑ "T12/T13" from Sander et al. PLoS One, 2009

**Supplementary Figure 1B - In silico comparison of new DBLa targeting primers to old versions published by Lavstsen et al. PNAS, 2012**

| Primer name<br>(Target)                               | Forward primers<br><br>Mixed to a final total primer concentration of 20 µM                                                                                              | Reverse primers<br><br>Mixed to a final total primer concentration of 20 µM                                                                             | Amplicon size<br><br>Median (Min - Max) bp | Coverage<br><br>Number of sequences amplified with intended domain class / number of sequences with intended domain class (%) | Specificity<br><br>Number of sequences amplified with intended domain class / number of domain sequences amplified (%) | CIDR1 linkage<br><br>Distribution of the CIDR1 subclasses linked to targeted DBLa sequences |
|-------------------------------------------------------|--------------------------------------------------------------------------------------------------------------------------------------------------------------------------|---------------------------------------------------------------------------------------------------------------------------------------------------------|--------------------------------------------|-------------------------------------------------------------------------------------------------------------------------------|------------------------------------------------------------------------------------------------------------------------|---------------------------------------------------------------------------------------------|
| DBLa1.5/6a<br>Lavstsen et al PNAS,<br>2012            | GATTAYGTCCCTCAATTTTAMGWTGGT                                                                                                                                              | GATTTGTTTTATTACAATCGTAACCCCTC                                                                                                                           | 157 (157-160)                              | 26%                                                                                                                           | 100%                                                                                                                   | 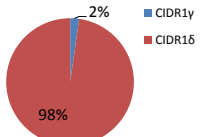         |
| DBLa1.5/6b<br>Lavstsen et al PNAS,<br>2012            | ATTGTAGTMRKGAGGTTACGATTGTA                                                                                                                                               | CWITYTKACAAYKGGACAWTCTARATC                                                                                                                             | 90 (90-90)                                 | 48%                                                                                                                           | 97%                                                                                                                    |         |
| DBLa1.5/6/8<br>(DBLa1.5/6/8)<br>Present study         | GATTAYGTBCCTCAATTTTAMGWTGGT                                                                                                                                              | GATTTGTTTTWTACAATCGTAACCCCTC<br>GATCTGTTCGTTTACAATCGTAACCCCTC<br>TTTTAGTACAATCATAACCATCACCA<br>ACAATCCTCACCATCACCACATAAAT<br>CGTGATATATCTGTTTKAGTACAATC | 157 (144-173)                              | 73%                                                                                                                           | 90%                                                                                                                    |        |
| DBLa1 not var3<br>Lavstsen et al PNAS,<br>2012        | TTGGGRAATBTGTTAGTTAYRGCAA                                                                                                                                                | CTGCAAACTKCGWGCAAG                                                                                                                                      | 109 (109-121)                              | 72%                                                                                                                           | 89%                                                                                                                    |        |
| DBLa1all<br>(DBLa1.1-8)<br>Present study              | TTGGGAAATGTRTRTGTACAGCAA<br>TTGGGAAATGTGTTAGTTATGGCAA<br>TTGGGAAATTTGTTAGTTATGGCAAG<br>TTGGGAACTATTAGTTATGGCAA<br>TTAGGAAATATATTGGTAGCAGCAA<br>TTAGGAAATATCTTGGTCACAGCAA | CCTATATCNGCAAACTKCKWGC                                                                                                                                  | 116 (116-128)                              | 92%                                                                                                                           | 100%                                                                                                                   |        |
| DBLa2/a1.1/2/4/7<br>Lavstsen et al PNAS,<br>2012      | TCCTACCAATTTAGATTACGTCCTCA                                                                                                                                               | CGTACAATCATATCCATTAAAGACTAC                                                                                                                             | 160 (160-169)                              | 33%                                                                                                                           | 97%                                                                                                                    |        |
| DBLa2/1.1/2/4/7<br>(DBLa2/1.1/2/4/7)<br>Present study | GATTAYGTBCCTCAATTTTAMGWTGGT                                                                                                                                              | TACAATCATATCCATTAAAGACTACAA<br>TCACAATCGCATCATTATGACTACAA                                                                                               | 145 (145-157)                              | 82%                                                                                                                           | 82%                                                                                                                    |        |

Supplementary figure 1 **A)** In silico characterization of *var* gene primers used in the present study. **B)** In silico comparison of new DBL $\alpha$  targeting primers to old versions published by Lavstsen et al. PNAS, 2012. The primer sets DBLa1all, DBLa1.5/6/8 and DBLa2/1.1/2/4/7 target loci encoding DBL $\alpha$  domains, and replaced previously published primer sets designed for identical *var* subsets. A comparison of predicted coverage and specificity of new and old primer sets is given, as is a distribution of the C-terminally linked CIDR types of the targeted genes. The linkages to CIDR types help assess data reported by DBLa primers in relation to known binding phenotypes mediated by the CIDR domains.

| Domain          | DBLα    |         |         |         |         |         |         |         |         |          |          |          |          |          |          |          |          |          |          |          |          |          |          |          | DBLα1 |        |        |        |        |        |        |        |        |  |  |  |  |    |  |  |  |
|-----------------|---------|---------|---------|---------|---------|---------|---------|---------|---------|----------|----------|----------|----------|----------|----------|----------|----------|----------|----------|----------|----------|----------|----------|----------|-------|--------|--------|--------|--------|--------|--------|--------|--------|--|--|--|--|----|--|--|--|
| Domain          | DBLα0.1 | DBLα0.2 | DBLα0.3 | DBLα0.4 | DBLα0.5 | DBLα0.6 | DBLα0.7 | DBLα0.8 | DBLα0.9 | DBLα0.10 | DBLα0.11 | DBLα0.12 | DBLα0.13 | DBLα0.14 | DBLα0.15 | DBLα0.16 | DBLα0.17 | DBLα0.18 | DBLα0.19 | DBLα0.20 | DBLα0.21 | DBLα0.22 | DBLα0.23 | DBLα0.24 | DBLα2 | DBLα11 | DBLα12 | DBLα14 | DBLα17 | DBLα15 | DBLα16 | DBLα18 | DBLα13 |  |  |  |  |    |  |  |  |
| Group           |         |         |         |         |         |         |         |         |         |          |          |          |          |          |          |          |          |          |          |          |          |          |          |          |       |        |        |        |        |        |        |        |        |  |  |  |  |    |  |  |  |
| % of all vars   |         |         |         |         |         |         |         |         |         |          |          |          |          |          |          |          |          |          |          |          |          |          |          |          | 72    |        |        |        |        |        |        |        |        |  |  |  |  | 22 |  |  |  |
| Primer coverage |         |         |         |         |         |         |         |         |         |          |          |          |          |          |          |          |          |          |          |          |          |          |          |          |       |        |        |        |        |        |        |        |        |  |  |  |  | 82 |  |  |  |
| Primer coverage |         |         |         |         |         |         |         |         |         |          |          |          |          |          |          |          |          |          |          |          |          |          |          |          |       |        |        |        |        |        |        |        |        |  |  |  |  | 92 |  |  |  |
| Primer coverage |         |         |         |         |         |         |         |         |         |          |          |          |          |          |          |          |          |          |          |          |          |          |          |          |       |        |        |        |        |        |        |        |        |  |  |  |  | 73 |  |  |  |

  

| Domain          | DBLδ  |       |       |       |       |       |       |       |       | DBLζ  |       |       |       |       |       | DBLγ  |       |       |       |       |       |       |       |       |        |        |        |        |        |        |        |        |        |
|-----------------|-------|-------|-------|-------|-------|-------|-------|-------|-------|-------|-------|-------|-------|-------|-------|-------|-------|-------|-------|-------|-------|-------|-------|-------|--------|--------|--------|--------|--------|--------|--------|--------|--------|
| Domain          | DBLδ1 | DBLδ2 | DBLδ3 | DBLδ4 | DBLδ5 | DBLδ6 | DBLδ7 | DBLδ8 | DBLδ9 | DBLζ1 | DBLζ2 | DBLζ3 | DBLζ4 | DBLζ5 | DBLζ6 | DBLγ1 | DBLγ2 | DBLγ3 | DBLγ4 | DBLγ5 | DBLγ6 | DBLγ7 | DBLγ8 | DBLγ9 | DBLγ10 | DBLγ11 | DBLγ12 | DBLγ13 | DBLγ14 | DBLγ15 | DBLγ16 | DBLγ17 | DBLγ18 |
| Group           |       |       |       |       |       |       |       |       |       |       |       |       |       |       |       |       |       |       |       |       |       |       |       |       |        |        |        |        |        |        |        |        |        |
| % of all vars   | 66    | 1     | 1     | 2     | 3     | 1     | 1     | 1     | 1     | 2     | 3     | 4     | 3     | 2     | 4     | 2     | 4     | 1     | 2     | 3     | 3     | 2     | 2     | 2     | 3      | 7      | 3      | 3      | 2      | 2      | 2      | 2      | 1      |
| Primer coverage |       |       |       |       |       |       |       |       |       |       | 76    | 84    | 93    | 94    | 81    |       |       |       |       |       |       |       |       |       |        |        |        |        |        |        |        |        |        |

  

| Domain          | DBLβ  |        |        |        |        |       |       |       |       |       |       |       |       |          | DBLε     |          |          |          |        |       |       |       |       |       |       |       |       |       |        |        |        |        |
|-----------------|-------|--------|--------|--------|--------|-------|-------|-------|-------|-------|-------|-------|-------|----------|----------|----------|----------|----------|--------|-------|-------|-------|-------|-------|-------|-------|-------|-------|--------|--------|--------|--------|
| Domain          | DBLβ1 | DBLβ10 | DBLβ11 | DBLβ12 | DBLβ13 | DBLβ2 | DBLβ3 | DBLβ4 | DBLβ5 | DBLβ6 | DBLβ7 | DBLβ8 | DBLβ9 | DBLβpam1 | DBLβpam2 | DBLβpam3 | DBLβpam4 | DBLβpam5 | DBLε10 | DBLε1 | DBLε2 | DBLε3 | DBLε4 | DBLε5 | DBLε6 | DBLε7 | DBLε8 | DBLε9 | DBLε11 | DBLε12 | DBLε13 | DBLε14 |
| Group           |       |        |        |        |        |       |       |       |       |       |       |       |       |          |          |          |          |          |        |       |       |       |       |       |       |       |       |       |        |        |        |        |
| % of all vars   | 3     | 2      | 2      | 3      | 1      | 2     | 8     | 1     | 8     | 3     | 3     | 3     | 1     | 3        | 3        | 3        | 3        | 3        | 3      | 3     | 3     | 4     | 3     | 2     | 4     | 2     | 2     | 3     | 2      | 2      | 1      | 1      |
| Primer coverage | 53    |        |        |        |        | 13    |       | 37    |       | 78    |       | 78    |       |          |          | 100      |          |          |        |       | 80    |       |       |       | 76    |       | 88    |       | 91     | 67     | 85     | 85     |

  

| Domain          | CIDRα    |          |          |          |          |          |          |          |          |          |          |          |          |          |           |           |          |          |          |          |          |          |          |        |        |        |   |
|-----------------|----------|----------|----------|----------|----------|----------|----------|----------|----------|----------|----------|----------|----------|----------|-----------|-----------|----------|----------|----------|----------|----------|----------|----------|--------|--------|--------|---|
| Domain          | CIDRα1   |          |          |          |          |          | CIDRα2   |          |          |          |          |          | CIDRα3   |          |           |           |          |          |          |          |          |          |          |        |        |        |   |
| Domain          | CIDRα1.1 | CIDRα1.2 | CIDRα1.3 | CIDRα1.4 | CIDRα1.5 | CIDRα1.6 | CIDRα1.7 | CIDRα1.8 | CIDRα2.2 | CIDRα2.3 | CIDRα2.5 | CIDRα2.6 | CIDRα2.7 | CIDRα2.9 | CIDRα2.10 | CIDRα2.11 | CIDRα2.4 | CIDRα2.8 | CIDRα3.1 | CIDRα3.2 | CIDRα3.3 | CIDRα3.4 | CIDRα3.5 | CIDRα4 | CIDRα5 | CIDRα6 |   |
| Group           |          |          |          |          |          |          |          |          |          |          |          |          |          |          |           |           |          |          |          |          |          |          |          |        |        |        |   |
| % of all vars   | 3        | 2        | 1        | 1        | 1        | 1        | 1        | 1        | 5        | 4        | 4        | 3        | 3        | 3        | 2         | 5         | 2        | 4        | 3        | 8        | 4        | 3        | 5        | 1      | 3      | 5      | 5 |
| Primer coverage | 85       |          |          | 78       | 95       | 76       | 99       | 100      |          |          |          |          |          |          |           |           |          |          | 75       |          |          |          |          |        |        |        |   |

  

| Domain          | CIDRβ  |        |        |        |        |        |        | CIDRγ  |        |        |        |        |        |        |        |        |         |         |         | CIDRδ    |        |        |
|-----------------|--------|--------|--------|--------|--------|--------|--------|--------|--------|--------|--------|--------|--------|--------|--------|--------|---------|---------|---------|----------|--------|--------|
| Domain          | CIDRβ1 | CIDRβ2 | CIDRβ3 | CIDRβ4 | CIDRβ5 | CIDRβ6 | CIDRβ7 | CIDRγ1 | CIDRγ2 | CIDRγ3 | CIDRγ4 | CIDRγ5 | CIDRγ6 | CIDRγ7 | CIDRγ8 | CIDRγ9 | CIDRγ10 | CIDRγ11 | CIDRγ12 | CIDRγpam | CIDRδ1 | CIDRδ2 |
| Group           |        |        |        |        |        |        |        |        |        |        |        |        |        |        |        |        |         |         |         |          |        |        |
| % of all vars   | 35     | 3      | 2      | 4      | 5      | 4      | 1      | 3      | 3      | 2      | 3      | 3      | 2      | 2      | 2      | 2      | 1       | 1       | 1       | 3        | 4      | 2      |
| Primer coverage |        |        |        |        |        |        |        |        | 20     |        |        |        |        |        |        |        |         |         |         |          |        | 75     |

  

| N-terminal (excl var1) |               |               |          |      | C-terminal  |              |     |                  |          | All genes |     |    |
|------------------------|---------------|---------------|----------|------|-------------|--------------|-----|------------------|----------|-----------|-----|----|
| Group A CIDR1          | Group B CIDR1 | Group C CIDR1 | var2,osa | var3 | DBLβ domain | DBLεγ domain | DC5 | DBLδ-CIDR tandem | var2,osa | var3      |     |    |
| 20                     | 4             | 72            | 3        | 1    | 31          | 21           | 3   | 72               | 3        | 2         | 100 | 55 |
| 92                     | 97            | 17            | 100      | 100  | 20          | 92           | 97  | 84               | 100      | 100       |     |    |

Supplementary Figure 2. Overview of PfEMP1 domain classes, the estimated proportion of *var* genes encoding these, and coverage of the primer set. X indicate domain classes indirectly accounted for by primers targeting linked domain classes.



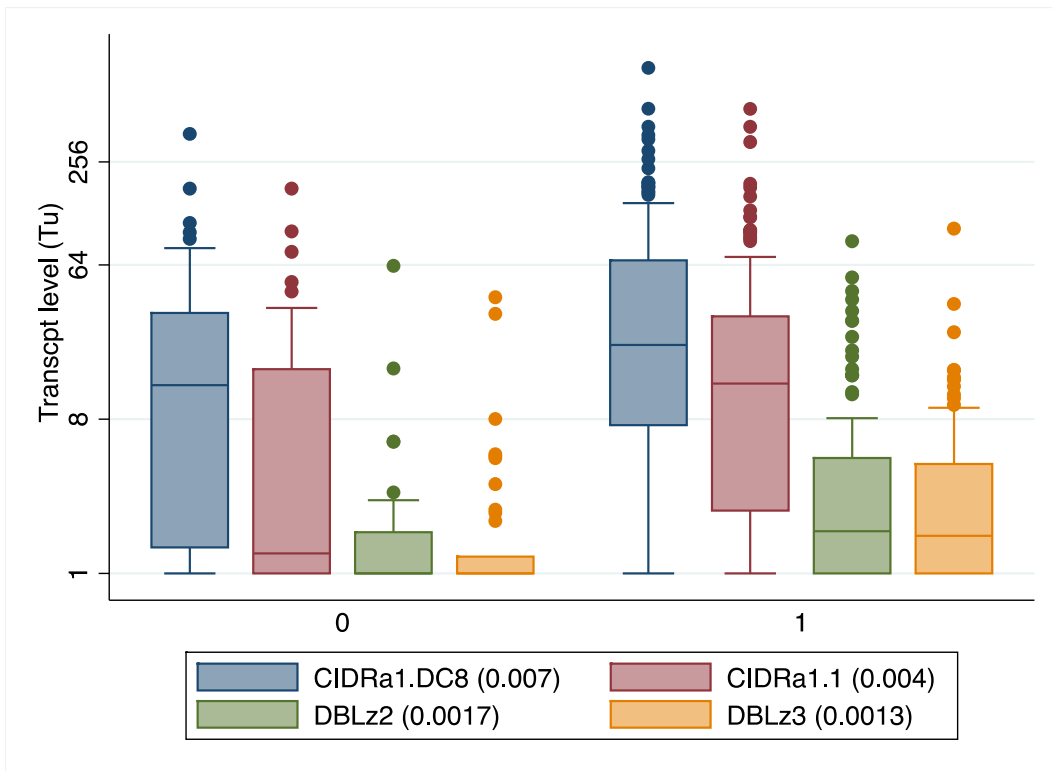

Supplementary Figure 3: Transcript levels by primer sets reporting statistically significant different transcript levels between hospitalized patients with uncomplicated and severe malaria. Median (25 and 75 percentiles, upper and lower adjacent values and outliers) *var* transcript levels (Tu) reported in children hospitalized with uncomplicated (N=42) or severe malaria (N=123). P values are for comparison of levels in the two groups of patients (uncomplicated and severe malaria patients) (Wilcoxon rank sum test).

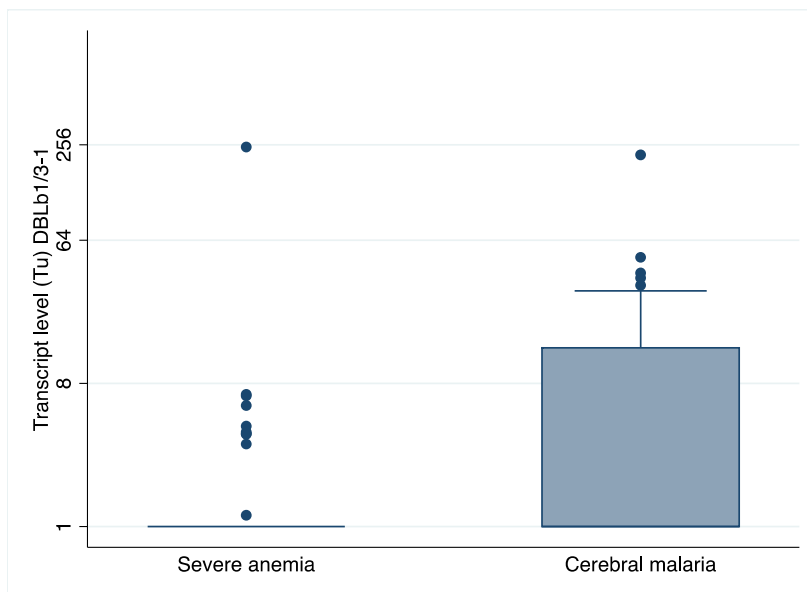

Supplementary Figure 4: Median (25 and 75 percentiles, upper and lower adjacent values and outliers) *var* transcript levels (Tu) reported in children with severe malarial anaemia (N=44) or cerebral malaria (N=29) with the primer set targeting DBL1/3-1.

Supplementary Table 1. Percentage of individuals of each patient group with *var* transcript levels higher than 16 Tu

| Primer(s)          | UM (%)<br>(95% C.I.) | SM (%)<br>(95% C.I.) | UM vs. SM<br>P | SA (%)<br>(95% C.I.) | CM (%)<br>(95% C.I.) | SA vs. CM<br>P |
|--------------------|----------------------|----------------------|----------------|----------------------|----------------------|----------------|
| CIDRa1.all > 16 Tu | 86                   | 86                   |                | 84                   | 83                   |                |
| CIDRa1.DC8 > 16 Tu | 43 (28-58)           | 64 (56-73)           | 0.015          | 55                   | 62                   |                |
| CIDRa1.A > 16 Tu   | 67                   | 61                   |                | 52                   | 59                   |                |
| CIDRd > 16 Tu      | 14                   | 12                   |                | 13                   | 24                   |                |
| DBLb1/3-1 > 16 Tu  | 10                   | 8                    |                | 2 (0-12)             | 24 (12-42)           | 0.01           |
| DBLz_all > 16 Tu   | 40                   | 58                   |                | 55                   | 72                   |                |

P values calculated using Fishers Exact test. 95% confidence intervals only shown for P values < 0.05 shown.
